# Supplementary material
Source: publisher figshare collection journal article supplement (https://karger.figshare.com/ndownloader/files/25111934)
Supplement: Supplementary file 1 [file 25111934]

**SUPPLEMENTARY MATERIAL**

**TABLE 1.** Univariable analysis of risk factors for 30-days mortality in patients aged under 75 years.

| Variables | Died with candidemia  (88 patients) |  | Survivor  (261 patients) | Odds Ratio | 95% CI | p-Value |
| --- | --- | --- | --- | --- | --- | --- |
| Demographics |  |  |  |  |  |  |
| Age | 65 (58-71) |  | 63 (52-70) | - | - | 0.032 |
| Gender (male) | 62/88 (70.5) |  | 149/261 (57.1) | 1.79 | 1.07-3.01 | 0.027 |
| Hospitalization area |  |  |  |  |  | 0.011 |
| Surgery/ICUs | 41/88 (46.6) |  | 162/261 (62.1) | (ref) |  |  |
| Medicine wards | 47/88 (53.4) |  | 99/261 (37.9) | 1.88 | 1.15-3.06 |  |
| Host-related factors |  |  |  |  |  |  |
| Solid cancer | 29/88 (32.9) |  | 89/257 (34.6) | 0.93 | 0.56-1.55 | 0.78 |
| Diabetes mellitus | 30/88 (34.1) |  | 54/260 (20.8) | 1.97 | 1.16-3.36 | 0.012 |
| Haematological cancer | 1/88 (1.1) |  | 10/258 (3.9) | 0.29 | 0.04-2.26 | 0.13 |
| Charlson score | 4 (2-6) |  | 3 (1-6) | - | - | 0.039 |
| Albuminemia | 2.1 (2.0-3.0) |  | 2.8 (2.0-3.0) | - | - | 0.034 |
| Concomitant bacteraemia | 21/88 (23.9) |  | 75/261 (28.7) | 0.78 | 0.44-1.36 | 0.38 |
| Autoimmune disease | 8/88 (9.1) |  | 17/258 (6.6) | 1.42 | 0.59-3.41 | 0.43 |
| Burns | 3/88 (3.4) |  | 7/257 (2.7) | 1.26 | 0.32-4.98 | 0.72 |
| Chronic renal failure | 15/88 (17.0) |  | 30/260 (11.5) | 1.58 | 0.80-3.09 | 0.18 |
| Polytrauma | 1/88 (1.1) |  | 20/258 (7.8) | 0.14 | 0.02-1.04 | 0.025 |
| Healthcare-related factors |  |  |  |  |  |  |
| Central venous catheter | 67/88 (76.1) |  | 204/260 (78.5) | 0.88 | 0.49-1.55 | 0.65 |
| Dialysis | 12/88 (13.6) |  | 17/258 (6.6) | 2.24 | 1.02-4.9 | 0.039 |
| Prior antibacterial exposure | 68/72 (94.4) |  | 222/237 (93.7) | 1.15 | 0.37-3.58 | 0.81 |
| Corticosteroid therapy | 22/88 (25) |  | 46/258 (17.8) | 1.54 | 0.86-2.74 | 0.14 |
| Mechanical ventilation | 34/88 (38.6) |  | 90/260 (34.6) | 1.19 | 0.72-1.96 | 0.5 |
| Major surgery | 28/88 (31.8) |  | 120/258 (46.5) | 0.54 | 0.32-0.89 | 0.016 |
| Peripheral parenteral nutrition | 14/87 (16.1) |  | 31/255 (12.2) | 1.39 | 0.7-2.75 | 0.35 |
| Total parenteral nutrition | 50/78 (64.1) |  | 145/253 (57.3) | 1.33 | 0.79-2.25 | 0.29 |
| CVC removal | 33/55 (60) |  | 169/193 (87.6) | 0.21 | 0.11-0.42 | <0.0001 |
| Chemotherapy | 13/86 (15.1) |  | 20/256 (7.8) | 2.10 | 1.00-4.43 | 0.047 |
| Immunosuppressive therapy | 9/88 (10.2) |  | 19/258 (7.4) | 1.43 | 0.62-3.30 | 0.40 |
| Candida spp distribution |  |  |  |  |  | 0.8 |
| *Candida albicans* | 42/88 (47.8) |  | 143/261 (54.8) | 0.75 | 0.46-1.22 |  |
| *Candida glabrata* | 15/88 (17) |  | 36/261 (13.8) | 1.28 | 0.67-2.48 |  |
| *Candida parapsilosis* | 13/88 (14.8) |  | 37/261 (14.2) | 1.05 | 0.53-2.08 |  |
| *Candida tropicalis* | 9/88 (10.2) |  | 25/261 (9.5) | 1.08 | 0.48-2.4 |  |
| Other *candida* non-*albicans* spp | 9/88 (10.2) |  | 20/261 (7.7) | 1.37 | 0.6-3.14 |  |
| Antifungal therapy |  |  |  |  |  | 0.008 |
| No | 12/70 (17.1) |  | 16/237 (6.7) | (ref) | - |  |
| Yes | 58/70 (82.9) |  | 221/237 (93.3) | 0.35 | 0.16-0.78 |  |
| Antifungal therapy |  |  |  |  |  | 0.65 |
| Inadequate | 9/58 (15.5) |  | 40/221 (18.1) | (ref) | - |  |
| Adequate | 49/58 (84.5) |  | 181/221 (81.9) | 1.2 | 0.55-2.65 |  |
| Severity of sepsis |  |  |  |  |  |  |
| Sepsis |  |  |  |  |  | <0.001 |
| Severe sepsis | 10/76 (13.5) |  | 92/227 (40.5) | 0.22 | 0.11-0.45 |  |
| Septic shock | 23/76 (30.3) |  | 91/227 (40.1) | 0.65 | 0.37-1.13 |  |
